# Supplementary material for: AIM2 inflammasome-derived IL-1β induces postoperative ileus in mice
Source: PubMed Central journal article supplement (PMC6646358; doi:10.1038/s41598-019-46968-1), 2019-07-22
Supplement: 41598_2019_46968_MOESM1_ESM.pdf [file 41598_2019_46968_MOESM1_ESM.pdf]

Supplementary Information

## AIM2 inflammasome-derived IL-1 $\beta$ induces postoperative ileus in mice

Hupa KJ<sup>1</sup>, Stein K<sup>1</sup>, Schneider R<sup>1</sup>, Lysson M<sup>1</sup>, Schneiker B<sup>1</sup>, Hornung V<sup>2, #</sup>, Latz E.<sup>3</sup>,  
Iwakura Y<sup>4</sup>, Kalff JC<sup>1</sup>, Wehner S<sup>1\*</sup>.

A

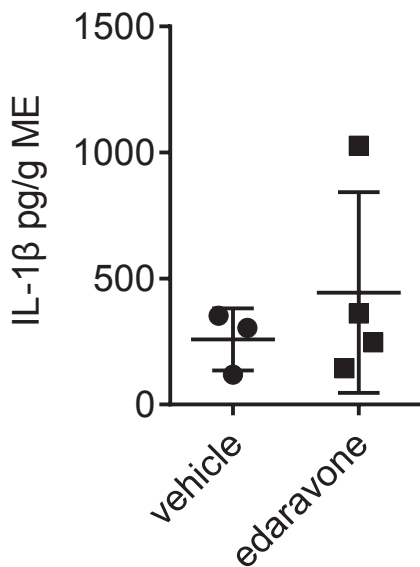

B

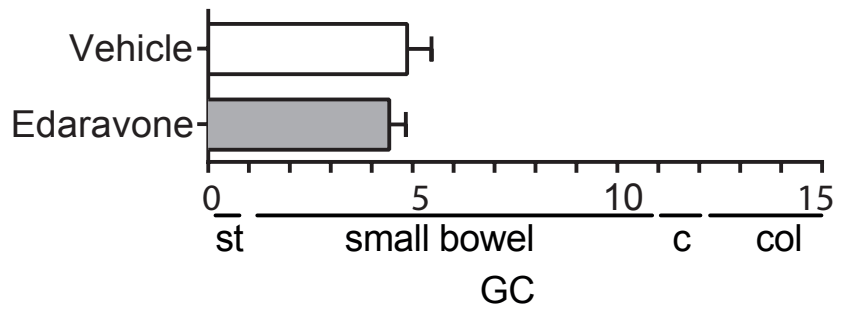

C

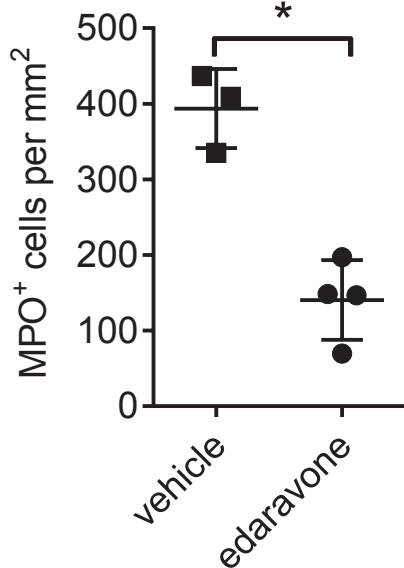

### Supplementary figure S1

Wt mice underwent antioxidant (Edaravone) or vehicle i.v. injection and were analysed for (A) IL-1 $\beta$  release from ME organ cultures, (B) gastrointestinal motility and (C) numbers of myeloperoxidase (MPO)<sup>+</sup> leukocytes 24h after IM. Statistical analyses: student's t-test ( $n_{\text{vehicle}}=3$ ,  $n_{\text{edaravone}}=4$ ). GC= geometric centre, st = stomach, c = cecum, col = colon
